# Supplementary material
Source: publisher figshare collection journal article supplement (https://aacr.figshare.com/articles/dataset/_/22478748)
Supplement: Supplementary file 1 [file 39930246]

**Safety and Immunogenicity of LY3415244, a Bispecific Antibody Against TIM-3 and PD-L1, in Patients With Advanced Solid Tumors**

**Supplemental Table 4. Anti-drug antibody epitope specificity analysis**

| Cohort (mg)    | Visit            | Mean Tier 2 Percent Inhibition, (%) |                     |                       |
|----------------|------------------|-------------------------------------|---------------------|-----------------------|
|                |                  | TIM-3/PD-L1 (LY3415244)             | Anti-TIM-3 Ab (C22) | Anti-PDL1 Ab (ABC110) |
| <b>A1 (3)</b>  | C1D1 (Day 1)     | 36                                  | 34                  | 12                    |
|                | C1D15 (Day 14)   | 46                                  | 44                  | 6                     |
|                | C2D1 (Day 28)    | 87                                  | 41                  | 54                    |
|                | Day 83           | 100                                 | 59                  | 47                    |
| <b>A2 (10)</b> | C1D1 (Day 1)     | 20                                  | 15                  | 3                     |
|                | C1D15 (Day 14)   | 28                                  | 21                  | 11                    |
|                | C2D1 (Day 28)    | 85                                  | 65                  | 59                    |
|                | C3D1 (Day 58)    | 97                                  | 45                  | 79                    |
| <b>A3 (30)</b> | C1D1 (Day 1)     | 42                                  | 19                  | 29                    |
|                | C1D15 (Day 14)   | 93                                  | 89                  | 12                    |
|                | C2D1 (Day 28)    | 99                                  | 91                  | 25                    |
|                | C3D1 (Day 58)    | 100                                 | 89                  | 37                    |
| <b>A4 (70)</b> | C1D1 (Day 1)     | 33                                  | 28                  | 5                     |
|                | C1D15 (Day 14)   | 100                                 | 84                  | 63                    |
|                | IRR Kit (Day 29) | 100                                 | 76                  | 61                    |
|                | IRR Kit (Day 36) | 100                                 | 73                  | 59                    |

Abbreviations: Ab, antibody; C, cycle; D, day; IRR, infusion-related reaction; PD-L1, programmed death ligand 1; IRR, infusion-related reaction; TIM-3, T cell immunoglobulin and mucin-domain-containing molecule-3.

Note: IRR kit contains blood collection tubes to assess antidrug antibodies. Drug concentration and may be analyzed for exploratory hypersensitivity markers of basophil/mast cell activation (e.g., tryptase), immune complex formation (e.g., C3 levels), and cytokine release (e.g., IL-6) as appropriate for the clinical presentation.
